# Supplementary material
Source: PubMed Central journal article supplement (PMC6462240)

## 1 SUPPLEMENTARY INFORMATION

2

### 3 SUPPLEMENTARY MATERIALS AND METHODS

4 **Antibodies** – The following antibodies are from BioLegend (San Diego, CA): Phycoerythrin (PE)-  
5 mouse anti-human ICAM-1/CD54, phycoerythrin-cyanine 7 (PE-Cy7)-mouse anti-human  
6 CCR2/CD192, peridinin chlorophyll protein–cyanine 5.5 (PerCP/Cy5.5)-mouse anti-human E-  
7 cadherin/CD324, fluorescein (FITC)-mouse anti-human HLA-ABC W6/32), FITC-mouse anti-  
8 human CD80, PerCP-Cy5.5-mouse anti-human CD11c, allophycocyanin (APC)-mouse anti-  
9 human MR/CD206, APC-mouse anti-human CD40, PerCP-Cy5.5-mouse anti-human  
10 MHCII/HLA-DR; isotype controls (PE-mouse IgG1  $\kappa$  isotype control, PE-Cy7-mouse IgG2a  $\kappa$   
11 isotype control, PerCP-Cy5.5-mouse IgG1  $\kappa$  isotype control, FITC-mouse IgG2a  $\kappa$  isotype control,  
12 FITC-mouse IgG1  $\kappa$  isotype control, PerCP-Cy5.5-mouse IgG2a  $\kappa$  isotype control, APC-mouse  
13 IgG1  $\kappa$  isotype control). The following are antibodies used for exposed-*M.tb* AT intracellular  
14 trafficking studies: Rabbit anti-human LC-3 (MBL International, Woburn, MA), Goat anti-human  
15 LAMP-1 (Santa Cruz, Dallas, TX), Mouse anti-human ABCA1 (Abcam, Cambridge, MA), Rabbit  
16 anti-human ABCA3 (Abcam), Donkey anti-rabbit Alexa Fluor 647, Chicken anti-mouse Alexa Fluor  
17 647, Donkey anti-goat Alexa Fluor 405, Donkey anti-mouse Alexa Fluor 405, and Donkey anti-  
18 goat Alexa Fluor 568 (all from ThermoFisher Scientific).

19

20 **Human ALF isolation** – Human alveolar lining fluid (ALF) was obtained from bronchoalveolar  
21 lavage fluid (BALF) as we previously described <sup>1</sup>. Briefly, BALF was obtained by BAL in sterile  
22 0.9% NaCl, 0.2  $\mu$ m-sterile filtered and subsequently concentrated 20-fold with a >10 kDa  
23 molecular mass cut off using a Centricon Plus (Millipore) filter at 4°C to achieve the volume of  
24 ALF present within the lungs devoid of surfactant lipids. ALF (defined as BALF >10 KDa fraction)  
25 <sup>1-5</sup> was frozen at -80°C until use.

26 **Acidification of ALF exposed-*M.tb* containing intracellular compartments in ATs – *M.tb***  
27 compartment acidification was determined as we previously published <sup>2,3</sup>. Briefly, L- or H-ALF  
28 *M.tb*-infected ATs were washed with warmed phenol-red free medium and incubated at 37°C for  
29 30 minutes with 75 nM LysoTracker (ThermoFisher Scientific). Following incubation, cells were  
30 fixed with cold 10% formalin for 10 minutes at room temperature. Quantification of co-localization  
31 of GFP-*M.tb* and LysoTracker was determined by counting  $\geq 150$  events per coverslip, performed  
32 in replicate, using the Olympus FV1000 Filter Confocal Microscope and Zeiss LSM 800 Confocal  
33 Microscope. All microscopy data were analyzed with the Olympus FluoView Viewer and Zeiss  
34 ZEN Software.

35  
36 **RNA isolation and gene expression** - AT gene expression was determined as we previously  
37 described <sup>2,4</sup>. Briefly, L- or H-ALF *M.tb*-infected ATs were lysed in TRIzol reagent (ThermoFisher  
38 Scientific) for 15 minutes at room temperature with gentle shaking every 5 minutes. Total RNA  
39 was extracted, evaluated using spectrophotometric analysis for quality and quantity, and 1  $\mu$ g  
40 RNA was reverse transcribed to cDNA by RT enzyme (SuperScript III) as we previously  
41 described. Gene expression was determined by qRT-PCR (BioRad CFX96 Real-Time System,  
42 Hercules, CA) using gene-specific primers and Taqman gene expression system. All gene  
43 expression values were normalized to housekeeping gene ( $\beta$ -actin) and fold change was  
44 calculated relative to uninfected ATs. All samples were run in duplicate by qRT-PCR.

45

46

#### 47 **SUPPLEMENTARY REFERENCES**

- 48 1. Arcos, J., *et al.* Human lung hydrolases delineate *Mycobacterium tuberculosis*-  
49 macrophage interactions and the capacity to control infection. *J. Immunol* **187**, 372-381  
50 (2011).

- 51 2. Arcos, J., *et al.* Lung mucosa lining fluid modifies *Mycobacterium tuberculosis* to  
52 reprogram human neutrophil killing mechanisms. *J Infect Dis* **212**, 948-958 (2015).
- 53 3. Arcos, J., *et al.* *Mycobacterium tuberculosis* cell wall released fragments by the action of  
54 the human lung mucosa modulate macrophages to control infection in an IL-10-dependent  
55 manner. *Mucosal Immunol* **10**, 1248-1258 (2017).
- 56 4. Scordo, J.M., *et al.* *Mycobacterium tuberculosis* cell wall fragments released upon  
57 bacterial contact with the human lung mucosa alter the neutrophil response to infection.  
58 *Front Immunol* **8**, 307 (2017).
- 59 5. Moliva, J.I., *et al.* Exposure to human alveolar lining fluid enhances *Mycobacterium bovis*  
60 BCG vaccine efficacy against *Mycobacterium tuberculosis* infection in a CD8(+) T-cell-  
61 dependent manner. *Mucosal Immunol* **11**, 968-978 (2018).

62

63

64

65

66

67

68

69

70

71

72

73

74

75

76

77 **Supplementary Table 1\*. Data for Multivariate Regression Analysis of Complement C3**78 **Function**

| <b>ALF#</b> | <b>Subset (L vs H)</b> | <b>Oxidation</b> | <b>Protein levels</b> | <b><i>M.tb</i>-Binding</b> |
|-------------|------------------------|------------------|-----------------------|----------------------------|
| 11          | L                      | 40.17008         | 3.050648              | 0.915998333                |
| 14          | L                      | 33.14912         | 5.81559               | 1.094339                   |
| 12          | L                      | 117.7563         | 2.613571              | 0.824757                   |
| 4           | L                      | 63.87487         | 2.950907              | 0.806304                   |
| 5           | H                      | 93.38155         | 2.412589              | 0.692752                   |
| 1           | H                      | 219.2849         | 4.558795              | 0.702768667                |
| 6           | H                      | 252.8068         | 3.489185              | 0.647114667                |
| 7           | H                      | 361.1781         | 9.277049              | 0.885315333                |

79

80 (\*) Raw data used to perform multivariate regression analyses for each ALF sample shown (ALF#):

81 ALF subset (Low vs High), oxidation (total protein tyrosine nitration) and innate protein levels

82 (concentration) *versus* innate protein function (*M.tb*-binding, OD<sub>450</sub>) for C3. All data shown has been

83 normalized for 1 mg/mL ALF phospholipid content.

84

85

86

87

88

89

90

91

92 **Supplementary Table 2\*. Data for Multivariate Regression Analysis of Surfactant Protein A**93 **Function**

| <b>ALF#</b> | <b>Subset (L vs H)</b> | <b>Oxidation</b> | <b>Protein levels</b> | <b><i>M.tb</i>-Binding</b> |
|-------------|------------------------|------------------|-----------------------|----------------------------|
| 11          | L                      | 40.17008         | 217.2859009           | 2.545135333                |
|             |                        |                  | Not                   |                            |
| 14          | L                      | 33.14912         | Determined            | 2.188874333                |
| 12          | L                      | 117.7563         | 1.173810577           | 2.778242333                |
| 4           | L                      | 63.87487         | 61.03567849           | 2.393676667                |
| 5           | H                      | 93.38155         | 14.1991592            | 1.927447667                |
| 1           | H                      | 219.2849         | 37.97906461           | 1.815937                   |
|             |                        |                  | Not                   |                            |
| 6           | H                      | 252.8068         | Determined            | 1.963922333                |
| 7           | H                      | 361.1781         | 131.8583891           | 2.416066333                |

94

95 (\*) Raw data used to perform multivariate regression analyses for each ALF sample shown (ALF#):

96 ALF subset (Low vs High), oxidation (total protein tyrosine nitration) and innate protein levels

97 (concentration) *versus* innate protein function (*M.tb*-binding, OD<sub>450</sub>) for SP-A. All data shown has

98 been normalized for 1 mg/mL ALF phospholipid content.

99

100

101

102

103

104

105 **Supplementary Table 3\*. Data for Multivariate Regression Analysis of Surfactant Protein D**106 **Function**

| <b>ALF#</b> | <b>Subset (L vs H)</b> | <b>Oxidation</b> | <b>Protein levels</b> | <b><i>M.tb</i>-Binding</b> |
|-------------|------------------------|------------------|-----------------------|----------------------------|
| 11          | L                      | 40.17008         | 32.26231              | 0.93505                    |
| 14          | L                      | 33.14912         | 13.9998               | 0.810345                   |
| 12          | L                      | 117.7563         | 8.833574              | 1.062636                   |
| 4           | L                      | 63.87487         | 3.260941              | 0.840977                   |
| 5           | H                      | 93.38155         | 12.27038              | 0.468329333                |
| 1           | H                      | 219.2849         | 15.26958              | 0.603675333                |
| 6           | H                      | 252.8068         | 5.358528              | 0.68627                    |
| 7           | H                      | 361.1781         | 50.11288              | 0.940030667                |

107

108 (\*) Raw data used to perform multivariate regression analyses for each ALF sample shown (ALF#):

109 ALF subset (Low vs High), oxidation (total protein tyrosine nitration) and innate protein levels

110 (concentration) *versus* innate protein function (*M.tb*-binding, OD<sub>450</sub>) for SP-D. All data shown has

111 been normalized for 1 mg/mL ALF phospholipid content.

112

113

114

115

116

117

118

119

120

## 121 SUPPLEMENTARY FIGURE LEGENDS

122 **Supplementary Figure S1. L- and H-ALF-*M.tb* uptake by ATs.** AT-*M.tb* uptake (2 h post-  
123 infection, 2h PI) was assessed by performing colony forming units (CFUs) for determination of  
124 intracellular *M.tb*. Data was normalized to AT cell count, which was calculated immediately prior  
125 to exposed-*M.tb* AT infection. Numbers 1-14 represent individual ALF samples, with each ALF  
126 from a different healthy human donor. Numbers correspond to the same ALF samples shown in  
127 Fig. 1. One-way ANOVA post-Tukey analysis,  $p < 0.05$  ALFs 2, 4-6 vs. ALFs 12-14; for ALF 1 & 3  
128 vs. ALFs 13-14 # $p < 0.05$ .

129  
130 **Supplementary Figure S2. L-ALF and H-ALF does not alter *M.tb* trafficking within AT**  
131 **intracellular compartments.** Quantification of GFP-*M.tb* co-localization with intracellular  
132 markers in infected ATs by confocal microscopy. (A) LAMP-1, (B) LC3, (C) ABCA1 and (D)  
133 ABCA3 co-localization at 3-day post-infection (DPI). Low ALFs (white bars) and High ALFs (black  
134 bars) are shown, with each ALF plotted individually.

135  
136 **Supplementary Figure S3. L-ALF-*M.tb* induces more AT necrosis during late time points of**  
137 **infection.** ATs were infected with L-ALF and H-ALF-*M.tb* for 5 days and AT supernatants were  
138 collected throughout infection. AT supernatants were tested for release of LDH, according to kit  
139 instructions. Shown is exposed-*M.tb* induced AT cell death by LDH release, as a measure of cell  
140 necrosis, during infection on (A) 2 DPI and (B) 4 DPI;  $n=2$  in duplicate (mean  $\pm$  SD). L=Low-ALF-  
141 *M.tb* , H=H-ALF-*M.tb* infected ATs. Student's *t* test, L-ALF- vs. H-ALF-*M.tb*; \*\* $p < 0.01$ .

142  
143 **Supplementary Figure S4. Effect of L- and H-ALF-*M.tb* on AT immune mediator expression**  
144 **and production.** ATs were infected with L-ALF or H-ALF-*M.tb* for 5 days for determination of AT  
145 immune mediator production (A), gene expression (B) or surface marker expression (C&D). (A)  
146 AT protein production in supernatants was determined by ELISA per kit instructions. N=3 low and

147 4 high ALFs in triplicate; mean  $\pm$  SEM. **(B)** AT mRNA expression measured by qRT-PCR and  
148 shown as relative fold change vs uninfected ATs. N=3 low and 3 high ALFs, in duplicate; mean  $\pm$   
149 SEM. **(C)** AT surface expression and **(D)** Mean fluorescence intensity (MFI) measured by flow  
150 cytometry by counting >10,000 events per sample. Shown are n=1 low and 1 high ALF, in  
151 duplicate. L=Low-ALF-*M.tb* , H=H-ALF-*M.tb*, U=uninfected ATs. Student's *t* test, L-ALF- vs. H-  
152 ALF-*M.tb*; \*\*p<0.01.

153

154 **Supplementary Figure S5. Effect of supernatant from L- and H-ALF-*M.tb* infected ATs on**  
155 **macrophage surface expression.** Resting macrophages were exposed to 0.2 $\mu$ m-sterile filtered  
156 supernatants from L- and H-ALF-*M.tb* infected ATs for 24 hours and macrophage surface  
157 expression of CD80, MR/CD206 and HLA-DR, was assessed by flow cytometry. MFI fold change  
158 (*versus* resting MDMs exposed to uninfected AT supernatants) is shown for n=3 L-ALFs and 3 H-  
159 ALFs with 2 different human MDM donors performed in duplicate (mean  $\pm$  SD). L= macrophages  
160 incubated with L-ALF-*M.tb* infected AT supernatant & H= macrophages incubated with H-ALF-  
161 *M.tb* infected AT supernatant.



### Supplementary Figure S1

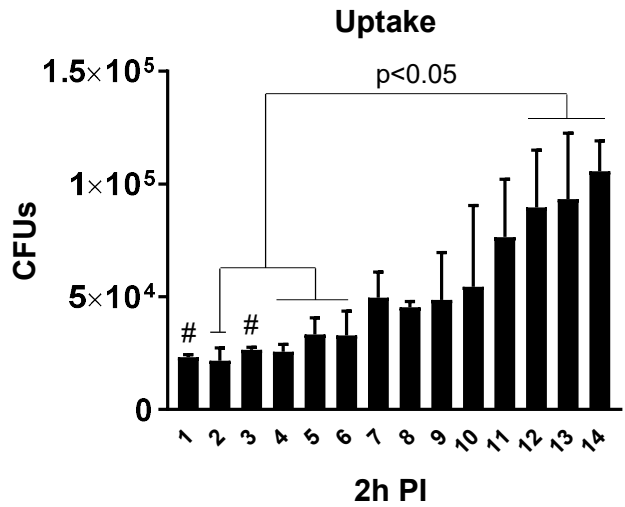

## Supplementary Figure S2

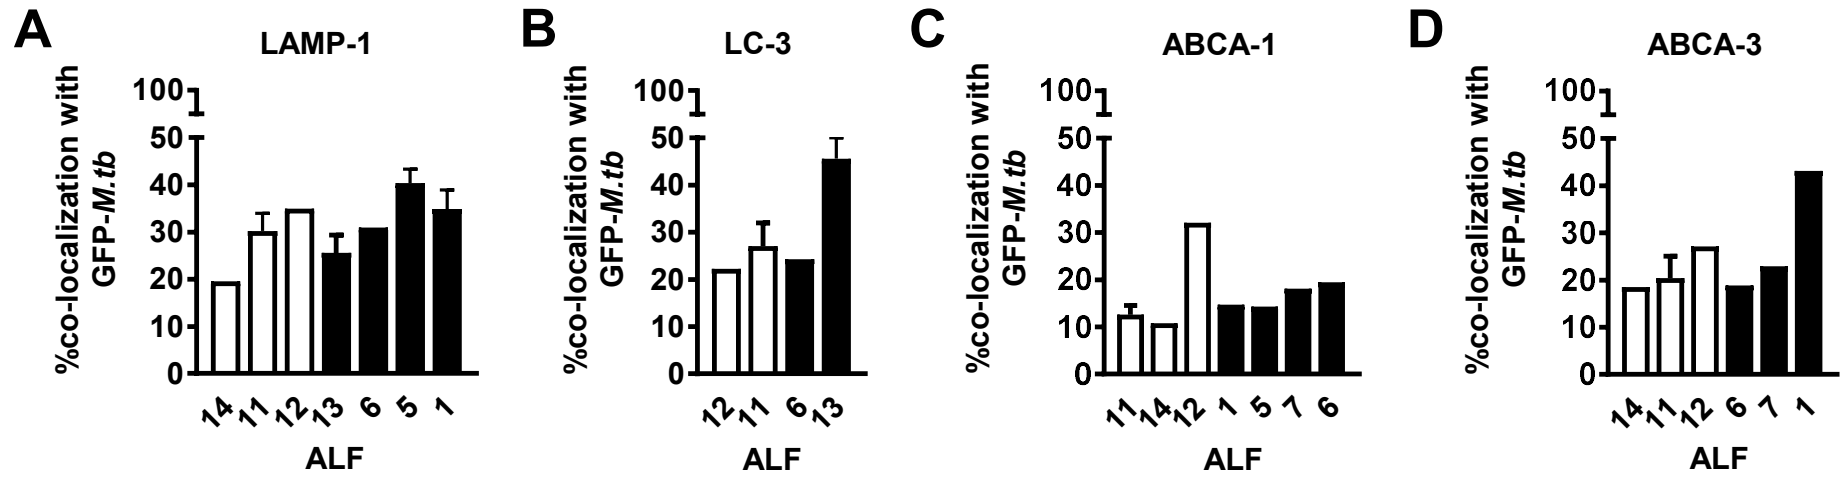

### Supplementary Figure S3

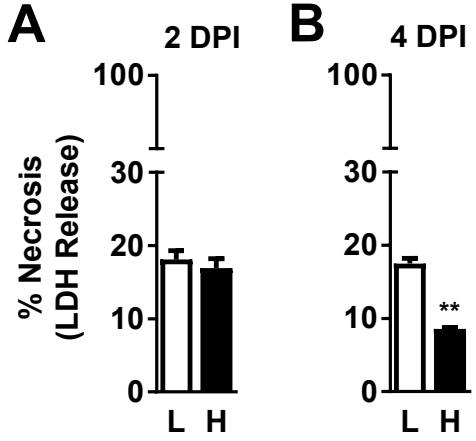

## Supplementary Figure S4

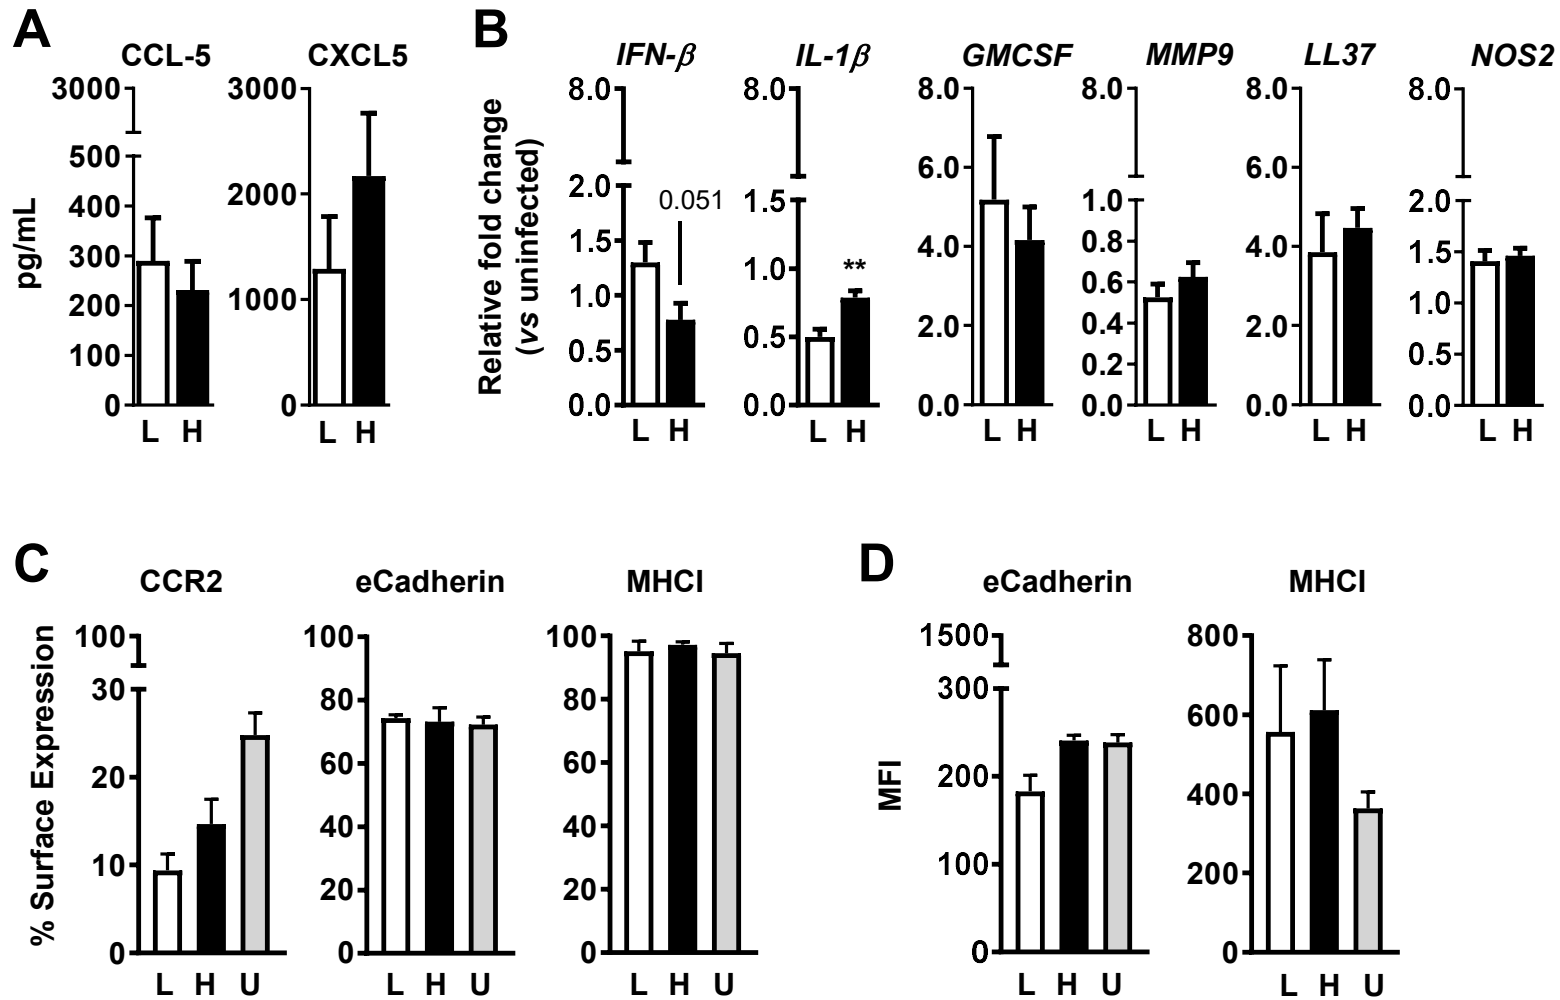

### Supplementary Figure S5

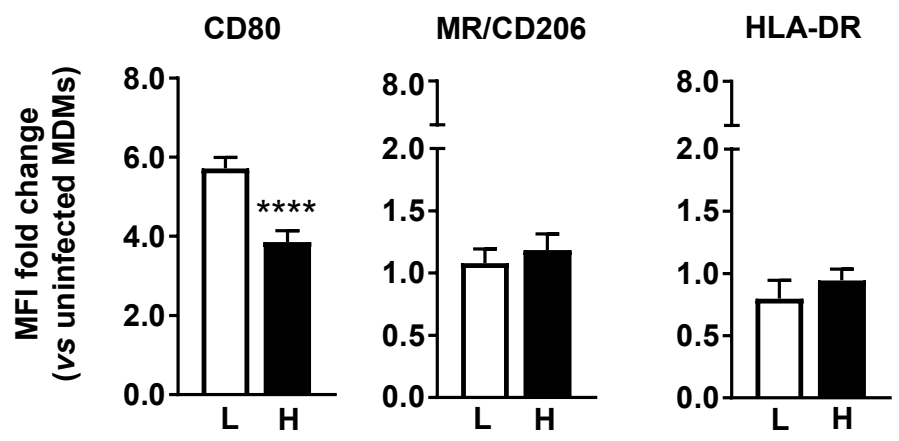

Supplement: NIHMS1522568-supplement-1.pdf [file NIHMS1522568-supplement-1.pdf]
